# Supplementary material for: Techno-economic Assessment of the Viability of Commercial Solar PV System in Port Harcourt, Rivers State, Nigeria
Source: Preprints.org preprint supplement (doi:10.20944/preprints202308.1820.v1), 2023-08-28
Supplement: Supplementary file 1 [file supplementary]

Archive with 3 entries (3 files):
- PV_System Supplementary_Data/Port Harcourt_Project.VC9-Report_New.pdf
- PV_System Supplementary_Data/Port Harcourt_Project.VC9-Report_New4.21h.pdf
- PV_System Supplementary_Data/Supplementary Data_TEA_PV_System.xlsx
