# Supplementary material for: Techno-economic Assessment of the Viability of Commercial Solar PV System in Port Harcourt, Rivers State, Nigeria
Source: Preprints.org preprint supplement (doi:10.20944/preprints202308.1820.v1), 2023-08-28
Supplement: Supplementary file 1 [file supplementary]

## Sheet: Baseline Calculation
PV SIZING
Daily Power	59.8	kW/day
Energy Demand	561	kWh/day
Sh	3.24	h (July)
fd	75	(%) Derating Factor
Module Power	585	Wp @STC
fd	75	%
PV Capacity	230.864	kW
Nmodules	394.64	Total
Nmod/s -min	10.8548	PV- minimum series connection
Nmod/s -max	14.4731	PV - maximum series connection
Nmod/s	12	PV- System Series connection
Nstrings	32.8866	PV- System Parallel connection
Total Panel	394.64	Total PV System Panels
Panel Power (kW)	230.864	kW
Battery Connections	30	Series connection
Inverter	74.75	kW Inverter minmum norminal power
Inverter Input voltage range	480V - 680V
Vin (min)	480	V
Vin (max)	640	V
Module Vmp	44.22	V
Module Imp	13.23	A
Voc	53.42	V (Open-circuit voltage)
Isc	13.91	A (Short-circuit current)
DA (Days)	Battery Capacity	Unit	Battery in Parallel	Total Battery
1	340206	Ah	113.402	3402.06
Battery Sizing Parameters	Value	Unit	Remark
Tc	10	%	Safety Margin
DA	1	day	Days of Autonomy
DM	10	%	Design Margin
DOD	85	%	Degree of Discharge
Vbat	2	V	Nominal Voltage
Beff	97	%	Battery Efficiency
System Voltage	60	V
Battery Capacity	3000	Ah
Month	E_Avalable (kWh)	E_User (kWh)	E_Unused (kWh)	E_Losses (kWh)	E_Missing (Unmet) (kWh)	E_Load (KWh)	Solar Fraction	Performance Ratio
January	33852	17391	14884	1577	0	17391	1	0.44
February	30233	15708	13820	705	0	15708	1	0.45
March	29995	17391	12434	170	0	17391	1	0.5
April	27249	16830	9047	1372	0	16830	1	0.52
May	25516	17391	7697	428	0	17391	1	0.57
June	20371	16830	3210	331	0	16830	1	0.7
July	19274	17391	2549	666	0	17391	1	0.755
August	20714	16466	2049	2199	925	17391	0.947	0.66
September	20318	15457	4226	635	1274	16830	0.918	0.63
October	22744	17391	4887	466	0	17391	1	0.63
November	25955	16830	8688	437	0	16830	1	0.515
December	32517	17391	13890	1236	0	17391	1	0.4
	Sum	202467					Average	0.564167
New simulation variant - Commercial Centre 2
Customised table
Month	EBatDis	EBatCh	UBatDis	IBatDis	OutConv	CnvLoss	Coverter Energy	Instant battery Output to User	Instant PV Output to User
Unit	kWh	kWh	V	Ah	kWh	kWh	kWh	kWh	kWh
January	10609	12101	63.8	166106	18968	814	19782	10172.5	7218.54
February	9940	10557	63.8	155579	16413	736	17149	9513.4	6194.6
March	10564	10659	63.8	165488	17561	835	18396	10084.5	7306.5
April	9033	10351	63.6	141751	18202	859	19061	8625.92	8204.08
May	9106	9484	63.7	142753	17819	850	18669	8691.4	8699.6
June	8469	8771	63.4	133598	17160	950	18110	8024.74	8805.26
July	8645	7952	63.1	136989	16726	997	17723	8158.68	9232.32
August	7518	9690	63.1	118824	18664	1010	19674	7132.05	9333.95
September	8028	8627	63	127008	16092	921	17013	7593.4	7863.6
October	8814	9242	63.1	139532	17857	996	18853	8348.36	9042.64
November	9412	9791	63.7	147562	17267	857	18124	8966.95	7863.05
December	10948	12101	63.8	171357	18627	755	19382	10521.5	6869.46
Year	111085	119325	63.5	1.74655e+06	211356	10580	221936	105789	96677.6
Hour	Daily Load Profile (kW)	Hourly Average Load (kW) - Best Month	Hourly Average Load (kW) - Worst Month	Hourly Average Load (kW) - Yearly Average
00:00:00	9	8.8	7.9	8.7
01:00:00	9	8.8	7.9	8.7
02:00:00	9	8.8	7.9	8.7
03:00:00	9	8.8	7.9	8.7
04:00:00	9	8.8	7.9	8.7
05:00:00	9	8.8	7.9	8.7
06:00:00	9	8.8	7.9	8.7
07:00:00	9	8.8	7.9	8.7
08:00:00	21	21.3	19.1	21
09:00:00	33.5	35.1	31.6	34.7
10:00:00	47	46.4	42	45.8
11:00:00	47	46.4	43.3	45.9
12:00:00	47	46.4	43.3	46
13:00:00	45	45	42	44.6
14:00:00	33.5	33.7	31.5	33.4
15:00:00	33.5	33.7	31.5	33.4
16:00:00	33.5	33.7	31.5	33.4
17:00:00	33.5	33.7	31.5	33.4
18:00:00	33.5	33.7	32.4	33.3
19:00:00	21	21.3	19.1	21
20:00:00	21	21.3	19.1	21
21:00:00	21	21.3	19.2	21
22:00:00	9	8.8	7.9	8.7
23:00:00	9	8.8	7.9	8.7
		Best Month	February
		Worst Month	July

## Sheet: Sensitivity Analysis
					Inverter
	Daily Power	59.8	kW/day		Input voltage range				Connection Configuration
	Energy Demand	561	kWh/day		Vin (min)	480	V		Voc	53.42	V
	Sh	4.21	h (Average)		Vin (max)	640	V		Ioc	13.91	A
	fd	75	% (Derating Factor)		Module Vmp	44.22	V
	Module Power	585	Wp @STC		Module Imp	13.23	A
	Parameters	fd	PV Capacity (kW)	Nmodules	Nmod/s (min)	Nmod/s (max)	Nmod/s	Nstrings	Total Panel	Panel Power (kW)
	Value	0.75	177.672	303.713	10.8548	14.4731	12	25.3094	303.713	177.672
	Designs	Sh (h)	PV Capacity (kW)	Total Panel	User Energy Need (kWh/year)	Availabe Energy (kWh/year	Useful Energy (kWh/year)	Excess Energy (kWh/year)	Missing Energy	Performance Ratio (%)	Solar Fraction (%)
	Baseline	3.21	231	395	204765	308736	202467	97355	2299	56.4	98.9
	Optimized	4.21	178	304	204765	241630	196780	37436	7987	69.6	96.1

## Sheet: PV Economic Analysis
	PV Cost	41699	$
	Battery Cost	99000	$
	Discount rate	0.08
	Tarrif rate	0.2	$
	Initial Investment Cost	152864	$
	Charge Controller	1010	$
	Inverter Cost	6985	$
	Installation/Logistics	4169.9	$
	O&M Cost	7643.19	$
	Battery Repl Cost	103950	$
	Inverter Repl Cost	7334.25
	Unused Energy	97381	kWh/yr
								PRESENT VALUE						BENEFITS
	Year	Initial Investment cost	Cost (O&M)	Cost (Repl)	Cost (Other)	Cost (Salvage)	Energy (kWh)	Initial cost	Cost (O&M)	Cost (repl)	Cost (other)	Cost (salvage)	Energy kWh	Benefit	Present Value Benefit
	0	152864						152864	0	0	0	0	0
	1		7643.19				202467	0	7077.03	0			187469	40493.4	37493.9
	2		7643.19				202467	0	6552.81	0			173583	40493.4	34716.6
	3		7643.19				202467	0	6067.41	0			160725	40493.4	32145
	4		7643.19				202467	0	5617.98	0			148819	40493.4	29763.9
	5		7643.19				202467	0	5201.83	0			137796	40493.4	27559.1
	6		7643.19				202467	0	4816.51	0			127589	40493.4	25517.7
	7		7643.19				202467	0	4459.73	0			118138	40493.4	23627.5
	8		7643.19				202467	0	4129.38	0			109387	40493.4	21877.3
	9		7643.19				202467	0	3823.5	0			101284	40493.4	20256.8
	10		7643.19				202467	0	3540.28	0			93781.4	40493.4	18756.3
	11		7643.19				202467	0	3278.04	0			86834.6	40493.4	17366.9
	12		7643.19				202467	0	3035.22	0			80402.4	40493.4	16080.5
	13		7643.19				202467	0	2810.39	0			74446.7	40493.4	14889.3
	14		7643.19				202467	0	2602.21	0			68932.1	40493.4	13786.4
	15		7643.19				202467	0	2409.45	0			63826	40493.4	12765.2
	16		7643.19	111284			202467	0	2230.98	32482.8			59098.2	40493.4	11819.6
	17		7643.19				202467	0	2065.72	0			54720.5	40493.4	10944.1
	18		7643.19				202467	0	1912.7	0			50667.2	40493.4	10133.4
	19		7643.19				202467	0	1771.02	0			46914	40493.4	9382.81
	20		7643.19				202467	0	1639.83	0			43438.9	40493.4	8687.79
	21		7643.19				202467	0	1518.36	0			40221.2	40493.4	8044.25
	22		7643.19				202467	0	1405.89	0			37241.9	40493.4	7448.38
	23		7643.19				202467	0	1301.75	0			34483.2	40493.4	6896.64
	24		7643.19				202467	0	1205.33	0			31928.9	40493.4	6385.78
	25		7643.19				202467	0	1116.04	0			29563.8	40493.4	5912.76
								152864	81589.4	32482.8			2.16129e+06		432258
	LCOE	0.123508	kWh
	Life Cycle Cost	266936	$
	Present Value Benefit	432258	$
	Net Present Value	165322	$
	IRR	20.5	%
	Simple Payback	3.77503	years
	EXCESS ENERGY BENEFIT
	Unsed Energy (kWh)	Present Value of Energy	Benefit
	97381	81150.8	16230.2
	97381	67625.7	13525.1
	97381	56354.7	11270.9
	97381	46962.3	9392.46
	97381	39135.2	7827.05
	97381	32612.7	6522.54
	97381	27177.2	5435.45
	97381	22647.7	4529.54
	97381	18873.1	3774.62
	97381	15727.6	3145.52
	97381	13106.3	2621.26
	97381	10921.9	2184.39
	97381	9101.61	1820.32
	97381	7584.67	1516.93
	97381	6320.56	1264.11
	97381	5267.13	1053.43
	97381	4389.28	877.856
	97381	3657.73	731.546
	97381	3048.11	609.622
	97381	2540.09	508.018
	97381	2116.74	423.349
	97381	1763.95	352.79
	97381	1469.96	293.992
	97381	1224.97	244.993
	97381	1020.81	204.161
		481801	96360.2
	Total Benefit	2.64309e+06	$
	LCOE	0.100994	kWh
	Present Value Benefit	528618	$
	Net Present Value	261682	$
	Simple Pyaback	1.25665	year
	IRR	50.8	%

## Sheet: O&M_Sensitivity
	Percentage Variability (%)	O&M Cost ($)	LCOE ($/kWh)
	1	1528.64	0.1
	3	4585.92	0.11
	5	7643.19	0.12
	7	10700.5	0.14
	10	15286.4	0.16
	12	18343.7	0.17
	15	22929.6	0.19

## Sheet: Diesel Gen. Economic Analysis
	Cost of Generator	58300	$
	Generator (Repl)	52470	$
	Discount rate	0.115
	Tarrif rate	0.23	$
	Installation/Logistics	5830	$
	O$M Cost	58722.7	$
								PRESENT VALUE						BENEFIT
	Year	Initial Investment cost	Cost (O&M)	Cost (Repl)	Cost (Other)	Cost (Salvage)	Energy (kWh)	Initial cost	Cost (O&M)	Cost (repl)	Cost (other)	Cost (salvage)	Energy kWh	Benefit	Present Value Benefit
	0	64130						64130	0	0	0	0	0
	1		58722.7				204765	0	52666.1	0			183646	47096	42238.5
	2		58722.7				204765	0	47234.2	0			164705	47096	37882.1
	3		58722.7				204765	0	42362.5	0			147717	47096	33975
	4		58722.7				204765	0	37993.3	0			132482	47096	30470.8
	5		58722.7				204765	0	34074.7	0			118818	47096	27328.1
	6		58722.7	58300			204765	0	30560.3	30340.3			106563	47096	24509.5
	7		58722.7				204765	0	27408.3	0			95572.2	47096	21981.6
	8		58722.7				204765	0	24581.4	0			85715	47096	19714.4
	9		58722.7				204765	0	22046.1	0			76874.4	47096	17681.1
	10		58722.7				204765	0	19772.3	0			68945.7	47096	15857.5
	11		58722.7				204765	0	17733	0			61834.7	47096	14222
	12		58722.7	58300			204765	0	15904.1	15789.6			55457.1	47096	12755.1
	13		58722.7				204765	0	14263.7	0			49737.3	47096	11439.6
	14		58722.7				204765	0	12792.6	0			44607.5	47096	10259.7
	15		58722.7				204765	0	11473.2	0			40006.7	47096	9201.54
	16		58722.7				204765	0	10289.8	0			35880.4	47096	8252.5
	17		58722.7				204765	0	9228.55	0			32179.8	47096	7401.35
	18		58722.7	58300			204765	0	8276.73	8217.14			28860.8	47096	6637.98
	19		58722.7				204765	0	7423.07	0			25884.1	47096	5953.35
	20		58722.7				204765	0	6657.47	0			23214.4	47096	5339.32
	21		58722.7				204765	0	5970.82	0			20820.1	47096	4788.63
	22		58722.7				204765	0	5355	0			18672.8	47096	4294.74
	23		58722.7				204765	0	4802.69	0			16746.9	47096	3851.78
	24		58722.7	58300			204765	0	4307.34	4276.34			15019.6	47096	3454.51
	25		58722.7				204765	0	3863.09	0			13470.5	47096	3098.22
								64130	477040	58623.3			1.66343e+06		382589
	LCOE	0.360576	kWh
	Life Cycle Cost	599794	$
	Present Value Benefit	382589	$
	Net Present Value	-217205	$
	Simple Payback Time	1.36169	year
	IRR	2.13848e+12	%

## Sheet: Inverter Datasheet
	Inverter Datasheet
	Parameters	Value
	Rated Power	80kW
	Peak Power	240 kVA
	Battery Voltage	384 VDC
	PV Input Voltage Range	480V – 640V
	Charging Current	100A
	Maximum PV Input Voltage	800V
	Inverter Type	Pure sine wave
	Efficiency	>95%
	Phase	3/N/PE

## Sheet: Energy_Power Use Calculation
	MARKET SQUARE
	Subject	Power Rating (W)	Quantity	Total Power (kW)	Daily Usage (h/day)	Energy (kWh/day)
	Refrigeration – back freezer	1125	2	2.25	24	54
	Refrigeration – back cooler	1100	2	2.2	24	52.8
	Refrigeration – store freezer closed	1100	8	8.8	2	35.2
	Refrigeration – store freezer open	1300	3	3.9	2	15.6
	Refrigeration – store cooler closed	1100	9	9.9	2	39.6
	Refrigeration -Total			27.05		197.2
	Lighting – Fluorescent T8	32	155	4.96	12	59.52
	Lighting – LED	13.5
	Lightening - Halogen
	Lighting – Total			4.96		59.52
	Air Conditioning	22500		22.5	12	270
	Cooking	1782		1.782	2	3.564
	Water Heating	1100		1.1	2	2.2
	ICT – ATM Machine	700	1	0.7	12	8.4
	ICT – Computer, Monitor, Printer	158	3	0.474	12	5.69
	ICT – Cash Register	200	6	1.2	12	14.4
	ICT - Total			2.374		28.49
	ACTUAL TOTAL			59.8		561
	LIVINCHUN SUPERMARKET
	Subject	Power Rating (W)	Amount	Total Power (W)
	Refrigeration – back freezer	1125	1	1125
	Refrigeration – back cooler	1100	1	1100
	Refrigeration – store freezer closed	1100	9	9900
	Refrigeration – store freezer open	1300	2	2600
	Refrigeration – store cooler closed	1100	3	3300
	Refrigeration -Total			18025
	Lighting – Fluorescent T8	32
	Lighting – LED	13.5
	Lightening - Halogen	60	120	7200
	Lighting – Total			7200
	Air Conditioning	5500		5500
	Cooking	1782		1782
	Water Heating	1100		1100
	ICT – ATM Machine	700	1	700
	ICT – Computer, Monitor, Printer	158	2	316
	ICT – Cash Register	200	4	800
	ICT - Total			1816
	ACTUAL TOTAL			35423
	WELCOME YOU SUPERMARKET
	Subject	Power Rating (W)	Amount	Total Power (W)
	Refrigeration – back freezer	1125	2	2250
	Refrigeration – back cooler	1100	1	1100
	Refrigeration – store freezer closed	1100	5	5500
	Refrigeration – store freezer open	1300	6	7800
	Refrigeration – store cooler closed	1100	8	8800
	Refrigeration -Total			25450
	Lighting – Fluorescent T8	32	210	6720
	Lighting – LED	13.5
	Lightening - Halogen	60
	Lighting – Total			6720
	Air Conditioning	4644		4644
	Cooking	1782		1782
	Water Heating	1100		1100
	ICT – ATM Machine	700	1	700
	ICT – Computer, Monitor, Printer	158	5	790
	ICT – Cash Register	200	6	1200
	ICT - Total			2690
	ACTUAL TOTAL			44340
	CHANRAIS SUPERMARKET
	Subject	Power Rating (W)	Amount	Total Power (W)
	Refrigeration – back freezer	1125	2	2250
	Refrigeration – back cooler	1100	4	4400
	Refrigeration – store freezer closed	1100	1	1100
	Refrigeration – store freezer open	1300	5	6500
	Refrigeration – store cooler closed	1100	8	8800
	Refrigeration -Total			23050
	Lighting – Fluorescent T8	32	150	4800
	Lighting – LED	13.5
	Lightening - Halogen	60
	Lighting – Total			4800
	Air Conditioning	9143		9143
	Cooking	1782		1782
	Water Heating	1100		1100
	ICT – ATM Machine	700	1	700
	ICT – Computer, Monitor, Printer	158	3	474
	ICT – Cash Register	200	5	1000
	ICT - Total			2174
	ACTUAL TOTAL			42049
	EVERYDAY SUPERMARKET
	Subject	Power Rating (W)	Amount	Total Power (W)
	Refrigeration – back freezer	1125	5	5625
	Refrigeration – back cooler	1100	2	2200
	Refrigeration – store freezer closed	1100	3	3300
	Refrigeration – store freezer open	1300	6	7800
	Refrigeration – store cooler closed	1100	15	16500
	Refrigeration -Total			35425
	Lighting – Fluorescent T8	32	165	5280
	Lighting – LED	13.5	56	756
	Lightening - Halogen
	Lighting – Total			6036
	Air Conditioning	7815		7815
	Cooking	1782		1782
	Water Heating	1100		1100
	ICT – ATM Machine	700	1	700
	ICT – Computer, Monitor, Printer	158	4	632
	ICT – Cash Register	200	8	1700
	ICT - Total			3032
	ACTUAL TOTAL			55190
	NEXTIME SUPERMARKET
	Subject	Power Rating (W)	Amount	Total Power (W)
	Refrigeration – back freezer	1125	4	4500
	Refrigeration – back cooler	1100	2	2200
	Refrigeration – store freezer closed	1100	4	4400
	Refrigeration – store freezer open	1300	7	9100
	Refrigeration – store cooler closed	1100	6	6600
	Refrigeration -Total			26800
	Lighting – Fluorescent T8	32	250	8000
	Lighting – LED	13.5
	Lightening - Halogen
	Lighting – Total			8000
	Air Conditioning	9800		9800
	Cooking	1782		1782
	Water Heating	1100		1100
	ICT – ATM Machine	700	1	700
	ICT – Computer, Monitor, Printer	158	3	474
	ICT – Cash Register	200	7	1400
	ICT - Total			4290
	ACTUAL TOTAL			51772
	NEXT SUPERMARKET
	Subject	Power Rating (W)	Amount	Total Power (W)
	Refrigeration – back freezer	1125	6	6750
	Refrigeration – back cooler	1100	7	7700
	Refrigeration – store freezer closed	1100	7	7700
	Refrigeration – store freezer open	1300	1	1300
	Refrigeration – store cooler closed	1100	2	2200
	Refrigeration -Total			25650
	Lighting – Fluorescent T8	32	110	3520
	Lighting – LED	13.5
	Lightening - Halogen
	Lighting – Total			3520
	Air Conditioning	12000		12000
	Cooking	1782		1782
	Water Heating	1100		1100
	ICT – ATM Machine	700	1	700
	ICT – Computer, Monitor, Printer	158	2	316
	ICT – Cash Register	200	5	1000
	ICT - Total			2016
	ACTUAL TOTAL			46068
