# Supplementary material for: Techno-economic Assessment of the Viability of Commercial Solar PV System in Port Harcourt, Rivers State, Nigeria
Source: Preprints.org preprint supplement (doi:10.20944/preprints202308.1820.v1), 2023-08-28
Supplement: Supplementary file 1 [file supplementary › PV_System Supplementary_Data/Port Harcourt_Project.VC9-Report_New.pdf]

# PVsyst - Simulation report

## Standalone system

Project: Commercial Center 1

Variant: New simulation variant - Commercial Centre

Standalone system with batteries

System power: 232 kWp

Port Harcourt - Nigeria

**Author**

Muzan Ijeoma (United states)

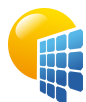

## Project: Commercial Center 1

Variant: New simulation variant - Commercial Centre

### PVsyst V7.3.4

VC9, Simulation date:  
24/05/23 05:56  
with v7.3.4

Muzan Ijeoma (United states)

### Project summary

#### Geographical Site

Port Harcourt  
Nigeria

#### Situation

Latitude 4.78 °N  
Longitude 7.01 °E  
Altitude 6 m  
Time zone UTC+1

#### Project settings

Albedo 0.20

#### Meteo data

Port Harcourt  
NASA-SSE satellite data 1983-2005 - Synthetic

### System summary

#### Standalone system

##### PV Field Orientation

Fixed plane  
Tilt/Azimuth 5 / 0 °

#### Standalone system with batteries

##### User's needs

Daily household consumers  
Constant over the year  
Average 561 kWh/Day

#### System information

##### PV Array

Nb. of modules 396 units  
Pnom total 232 kWp

##### Battery pack

Technology Lead-acid, sealed, Gel  
Nb. of units 330 units  
Voltage 60 V  
Capacity 33000 Ah

### Results summary

|                          |                 |                        |                  |                   |         |
|--------------------------|-----------------|------------------------|------------------|-------------------|---------|
| Useful energy from solar | 202469 kWh/year | Specific production    | 874 kWh/kWp/year | Perf. Ratio PR    | 56.41 % |
| Missing Energy           | 2299 kWh/year   | Available solar energy | 308736 kWh/year  | Solar Fraction SF | 98.88 % |
| Excess (unused)          | 97355 kWh/year  |                        |                  |                   |         |

### Table of contents

|                                                             |   |
|-------------------------------------------------------------|---|
| Project and results summary                                 | 2 |
| General parameters, PV Array Characteristics, System losses | 3 |
| Detailed User's needs                                       | 4 |
| Main results                                                | 5 |
| Loss diagram                                                | 6 |
| Predef. graphs                                              | 7 |
| Cost of the system                                          | 8 |



## Project: Commercial Center 1

Variant: New simulation variant - Commercial Centre

### PVsyst V7.3.4

VC9, Simulation date:  
24/05/23 05:56  
with v7.3.4

Muzan Ijeoma (United states)

### General parameters

#### Standalone system

#### PV Field Orientation

##### Orientation

Fixed plane

Tilt/Azimuth 5 / 0 °

#### User's needs

Daily household consumers

Constant over the year

Average 561 kWh/Day

#### Standalone system with batteries

#### Sheds configuration

No 3D scene defined

#### Models used

Transposition Perez  
Diffuse Perez, Meteornorm  
Circumsolar separate

### PV Array Characteristics

#### PV module

Manufacturer

Generic

Model

JKM585M-7RL4-V

(Original PVsyst database)

Unit Nom. Power

585 Wp

Number of PV modules

396 units

Nominal (STC)

232 kWp

Modules

33 Strings x 12 In series

#### At operating cond. (50°C)

Pmpp

211 kWp

U mpp

483 V

I mpp

437 A

#### Controller

Universal controller

Technology

MPPT converter

Temp coeff.

-5.0 mV/°C/Elem.

#### Converter

Maxi and EURO efficiencies

97.0 / 95.0 %

#### Total PV power

Nominal (STC)

232 kWp

Total

396 modules

Module area

1083 m<sup>2</sup>

#### Battery

Manufacturer

Generic

Model

EosG 3000

Technology

Lead-acid, sealed, Gel

Nb. of units

11 in parallel x 30 in series

Discharging min. SOC

20.0 %

Stored energy

1587.8 kWh

#### Battery Pack Characteristics

Voltage

60 V

Nominal Capacity

33000 Ah (C10)

Temperature

Fixed 20 °C

#### Battery Management control

Threshold commands as

SOC calculation

Charging

SOC = 0.92 / 0.75

approx.

68.5 / 62.7 V

Discharging

SOC = 0.20 / 0.45

approx.

58.9 / 61.1 V

### Array losses

#### Thermal Loss factor

Module temperature according to irradiance

Uc (const)

29.0 W/m<sup>2</sup>K

Uv (wind)

0.0 W/m<sup>2</sup>K/m/s

#### DC wiring losses

Global array res.

18 mΩ

Loss Fraction

1.5 % at STC

#### Series Diode Loss

Voltage drop

0.7 V

Loss Fraction

0.1 % at STC

#### Module Quality Loss

Loss Fraction

-0.8 %

#### Module mismatch losses

Loss Fraction

2.0 % at MPP

#### Strings Mismatch loss

Loss Fraction

0.1 %

#### IAM loss factor

Incidence effect (IAM): Fresnel, AR coating, n(glass)=1.526, n(AR)=1.290

| 0°    | 30°   | 50°   | 60°   | 70°   | 75°   | 80°   | 85°   | 90°   |
|-------|-------|-------|-------|-------|-------|-------|-------|-------|
| 1.000 | 0.999 | 0.987 | 0.962 | 0.892 | 0.816 | 0.681 | 0.440 | 0.000 |

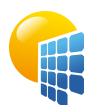

## PVsyst V7.3.4

VC9, Simulation date:  
24/05/23 05:56  
with v7.3.4

Muzan Ijeoma (United states)

## Detailed User's needs

Daily household consumers, Constant over the year, average = 561 kWh/day

## Annual values

|                       | Nb. | Power     | Use      | Energy |
|-----------------------|-----|-----------|----------|--------|
|                       |     | W         | Hour/day | Wh/day |
| Lamps (LED or fluo)   | 155 | 32/lamp   | 12.0     | 59520  |
| ICT                   | 30  | 80/app    | 12.0     | 28800  |
| Coolers Open/Closed   | 20  | 1130/app  | 2.0      | 45200  |
| Fridge / Deep-freeze  | 2   |           | 24       | 151699 |
| Air Conditioning      | 1   | 22500 tot | 12.0     | 270000 |
| Water Heating/Cooking | 1   | 2882 tot  | 2.0      | 5764   |
| Stand-by consumers    |     |           | 24.0     | 24     |
| Total daily energy    |     |           |          | 561007 |

## Hourly distribution

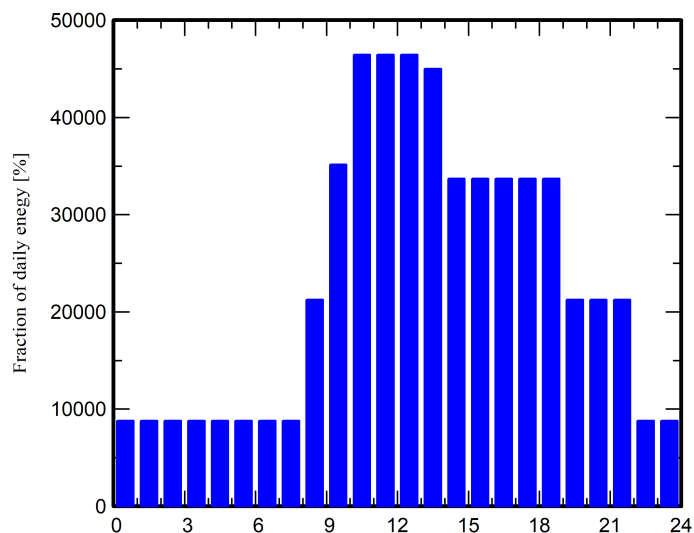



## Project: Commercial Center 1

Variant: New simulation variant - Commercial Centre

### PVsyst V7.3.4

VC9, Simulation date:  
24/05/23 05:56  
with v7.3.4

Muzan Ijeoma (United states)

### Main results

#### System Production

Useful energy from solar 202469 kWh/year  
Available solar energy 308736 kWh/year  
Excess (unused) 97355 kWh/year

Perf. Ratio PR 56.41 %  
Solar Fraction SF 98.88 %

#### Loss of Load

Time Fraction 1.2 %  
Missing Energy 2299 kWh/year

#### Battery aging (State of Wear)

Cycles SOW 96.4 %  
Static SOW 93.3 %

Normalized productions (per installed kWp)

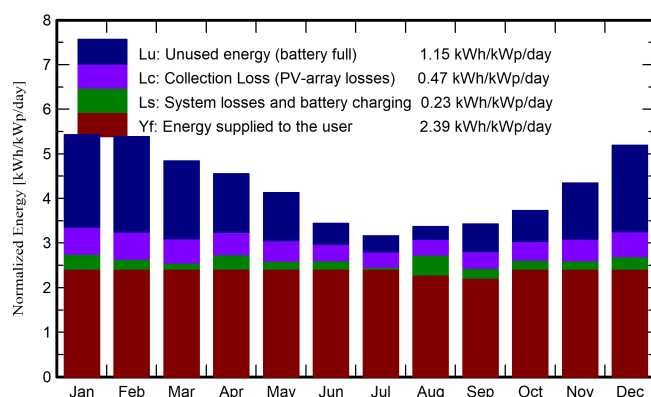

Performance Ratio PR

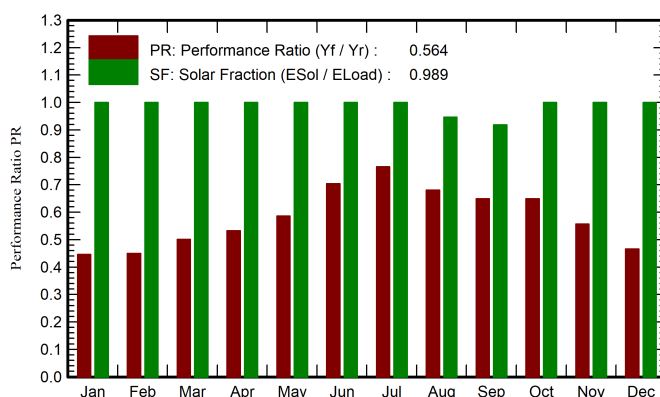

### Balances and main results

|           | GlobHor            | GlobEff            | E_Avail | EUnused | E_Miss | E_User | E_Load | SolFrac |
|-----------|--------------------|--------------------|---------|---------|--------|--------|--------|---------|
|           | kWh/m <sup>2</sup> | kWh/m <sup>2</sup> | kWh     | kWh     | kWh    | kWh    | kWh    | ratio   |
| January   | 161.2              | 165.0              | 33851   | 14858   | 0      | 17391  | 17391  | 1.000   |
| February  | 146.7              | 148.2              | 30233   | 13820   | 0      | 15708  | 15708  | 1.000   |
| March     | 148.8              | 147.1              | 29995   | 12434   | 0      | 17391  | 17391  | 1.000   |
| April     | 138.0              | 133.6              | 27249   | 9047    | 0      | 16830  | 16830  | 1.000   |
| May       | 131.1              | 124.8              | 25516   | 7697    | 0      | 17391  | 17391  | 1.000   |
| June      | 106.2              | 100.4              | 20371   | 3210    | 0      | 16830  | 16830  | 1.000   |
| July      | 100.4              | 95.3               | 19274   | 2549    | 0      | 17391  | 17391  | 1.000   |
| August    | 106.0              | 101.7              | 20714   | 2049    | 925    | 16466  | 17391  | 0.947   |
| September | 102.9              | 100.1              | 20318   | 4226    | 1374   | 15457  | 16830  | 0.918   |
| October   | 114.1              | 112.5              | 22744   | 4887    | 0      | 17391  | 17391  | 1.000   |
| November  | 126.3              | 127.1              | 25955   | 8688    | 0      | 16830  | 16830  | 1.000   |
| December  | 153.5              | 157.6              | 32517   | 13890   | 0      | 17391  | 17391  | 1.000   |
| Year      | 1535.2             | 1513.6             | 308736  | 97355   | 2299   | 202469 | 204768 | 0.989   |

#### Legends

GlobHor Global horizontal irradiation  
GlobEff Effective Global, corr. for IAM and shadings  
E\_Avail Available Solar Energy  
EUnused Unused energy (battery full)  
E\_Miss Missing energy

E\_User Energy supplied to the user  
E\_Load Energy need of the user (Load)  
SolFrac Solar fraction (EUsed / ELoad)

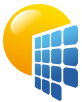

## Project: Commercial Center 1

Variant: New simulation variant - Commercial Centre

### PVsyst V7.3.4

VC9, Simulation date:  
24/05/23 05:56  
with v7.3.4

Muzan Ijeoma (United states)

#### Loss diagram

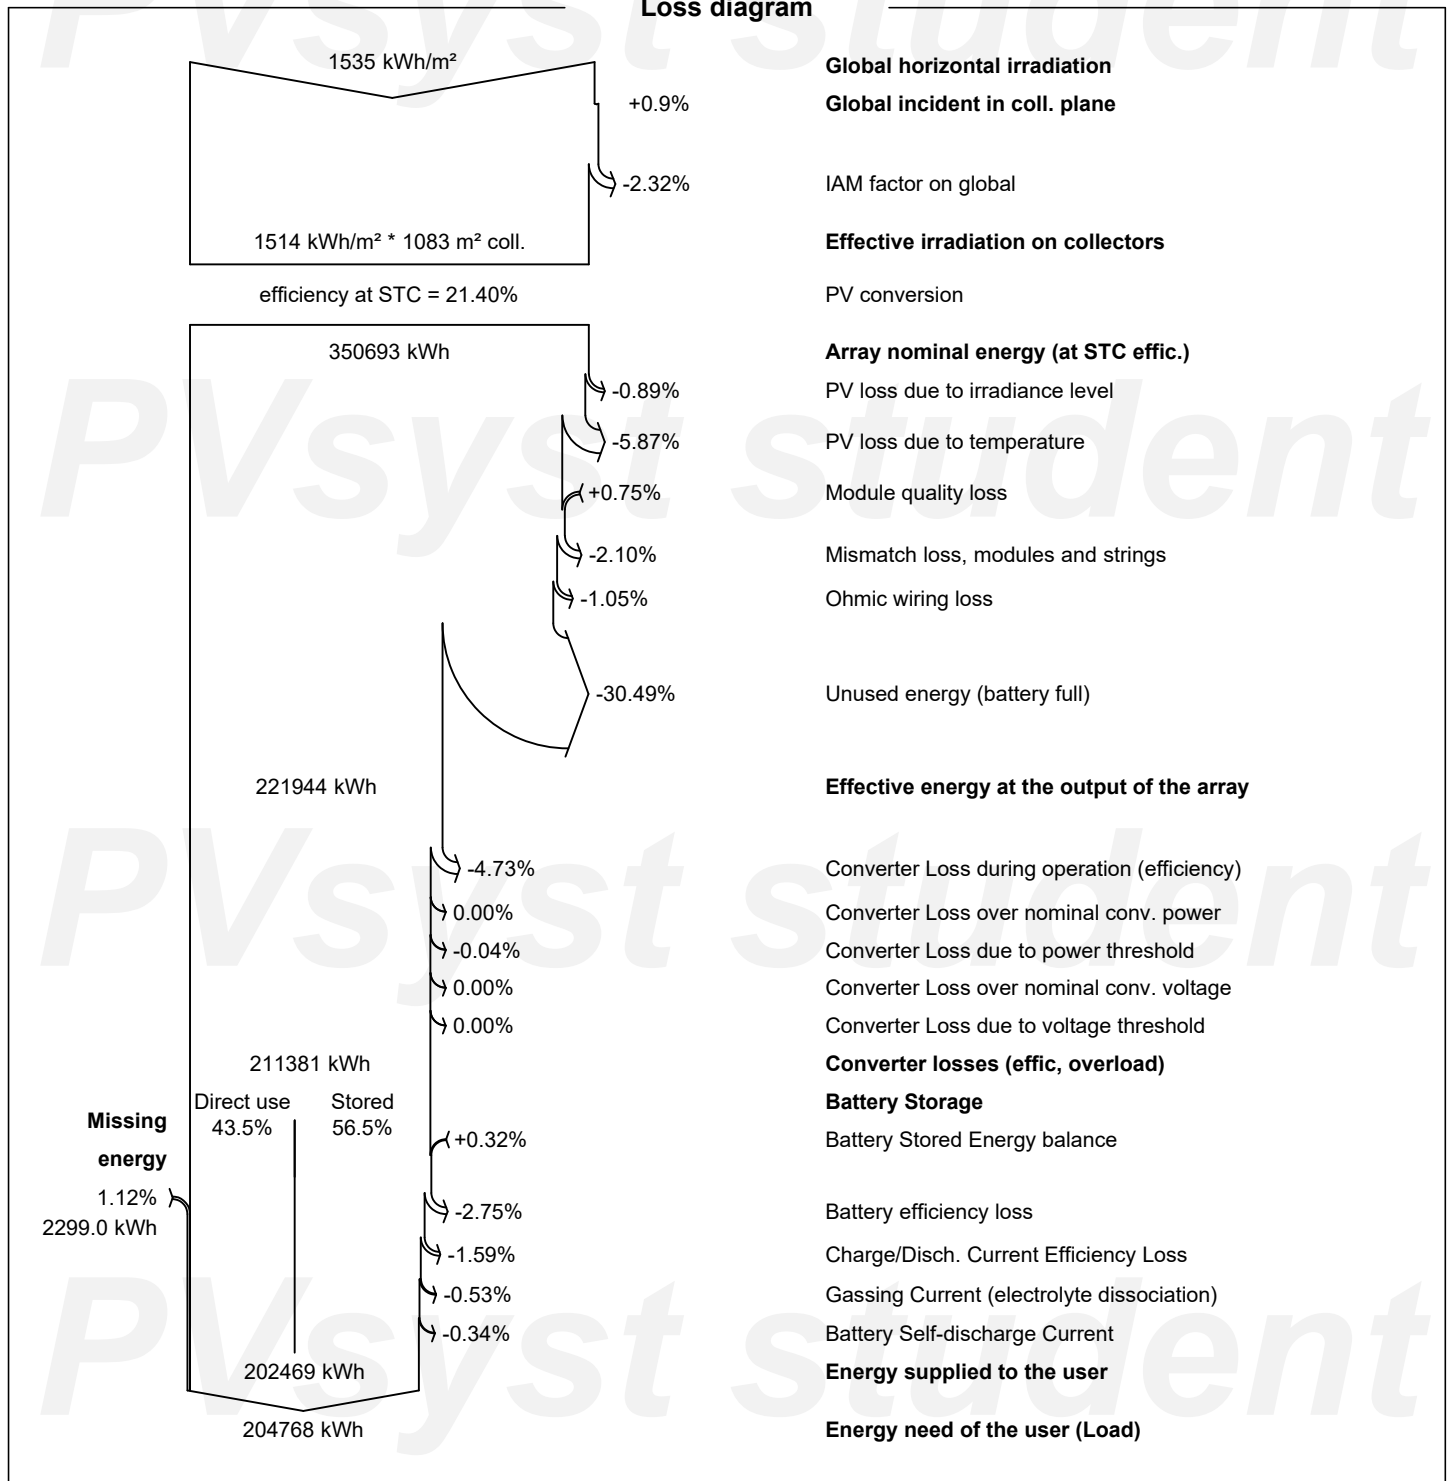

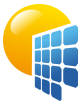

Predef. graphs

Daily Input/Output diagram

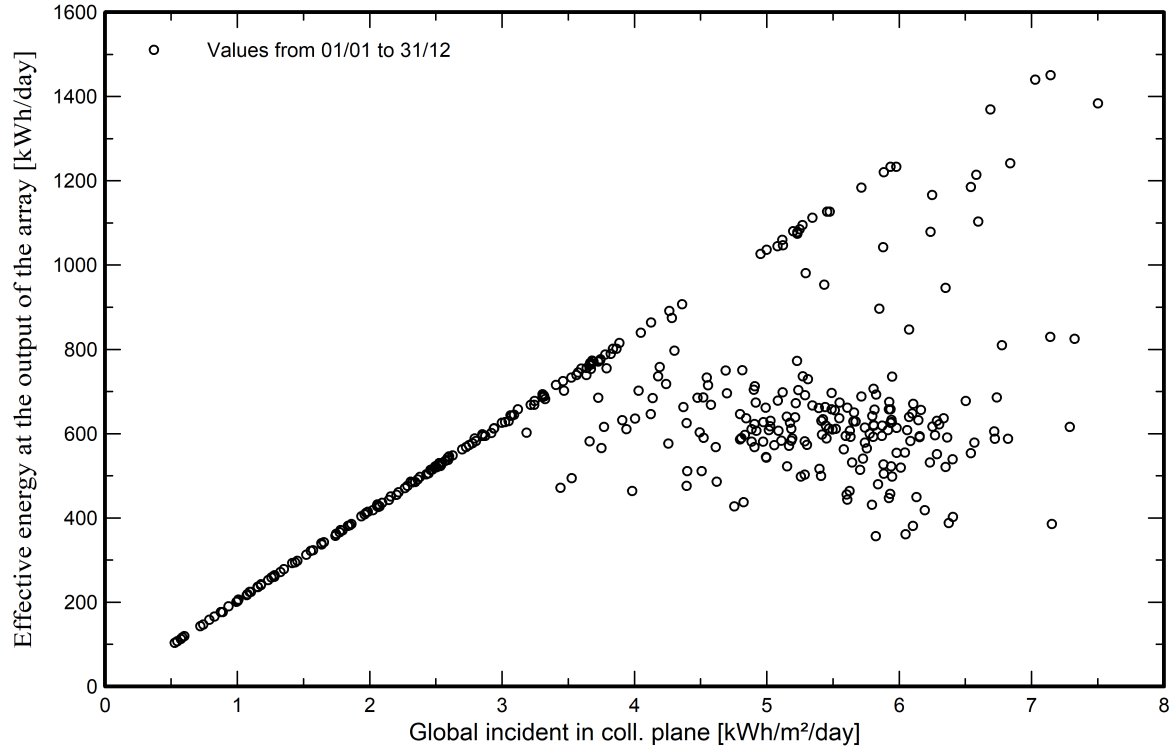



# Project: Commercial Center 1

Variant: New simulation variant - Commercial Centre

## PVsyst V7.3.4

VC9, Simulation date:  
24/05/23 05:56  
with v7.3.4

Muzan Ijeoma (United states)

### Cost of the system

#### Installation costs

| Item | Quantity<br>units | Cost<br>USD       | Total<br>USD |
|------|-------------------|-------------------|--------------|
|      |                   | Total             | 0.00         |
|      |                   | Depreciable asset | 0.00         |

#### Operating costs

| Item         | Total    |
|--------------|----------|
|              | USD/year |
| Total (OPEX) | 0.00     |

#### System summary

|                              |               |
|------------------------------|---------------|
| Total installation cost      | 0.00 USD      |
| Operating costs              | 0.00 USD/year |
| Excess energy (battery full) | 97.4 MWh/year |
| Used solar energy            | 202 MWh/year  |
| Used energy cost             | 0.367 USD/kWh |
