# Supplementary material for: Techno-economic Assessment of the Viability of Commercial Solar PV System in Port Harcourt, Rivers State, Nigeria
Source: Preprints.org preprint supplement (doi:10.20944/preprints202308.1820.v1), 2023-08-28
Supplement: Supplementary file 1 [file supplementary › PV_System Supplementary_Data/Port Harcourt_Project.VC9-Report_New4.21h.pdf]

# PVsyst - Simulation report

## Standalone system

Project: Commercial Center 1

Variant: New simulation variant - Commercial Centre

Standalone system with batteries

System power: 183 kWp

Port Harcourt - Nigeria

**Author**

Muzan Ijeoma (United states)

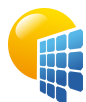

## Project: Commercial Center 1

Variant: New simulation variant - Commercial Centre

### PVsyst V7.3.4

VC9, Simulation date:  
24/05/23 07:17  
with v7.3.4

Muzan Ijeoma (United states)

### Project summary

#### Geographical Site

Port Harcourt  
Nigeria

#### Situation

Latitude 4.78 °N  
Longitude 7.01 °E  
Altitude 6 m  
Time zone UTC+1

#### Project settings

Albedo 0.20

#### Meteo data

Port Harcourt  
NASA-SSE satellite data 1983-2005 - Synthetic

### System summary

#### Standalone system

##### PV Field Orientation

Fixed plane  
Tilt/Azimuth 5 / 0 °

#### Standalone system with batteries

##### User's needs

Daily household consumers  
Constant over the year  
Average 561 kWh/Day

#### System information

##### PV Array

Nb. of modules 312 units  
Pnom total 183 kWp

##### Battery pack

Technology Lead-acid, sealed, Gel  
Nb. of units 330 units  
Voltage 60 V  
Capacity 33000 Ah

### Results summary

|                          |                 |                        |                   |                   |         |
|--------------------------|-----------------|------------------------|-------------------|-------------------|---------|
| Useful energy from solar | 196780 kWh/year | Specific production    | 1078 kWh/kWp/year | Perf. Ratio PR    | 69.58 % |
| Missing Energy           | 7987 kWh/year   | Available solar energy | 241630 kWh/year   | Solar Fraction SF | 96.10 % |
| Excess (unused)          | 37436 kWh/year  |                        |                   |                   |         |

### Table of contents

|                                                             |   |
|-------------------------------------------------------------|---|
| Project and results summary                                 | 2 |
| General parameters, PV Array Characteristics, System losses | 3 |
| Detailed User's needs                                       | 4 |
| Main results                                                | 5 |
| Loss diagram                                                | 6 |
| Predef. graphs                                              | 7 |
| Cost of the system                                          | 8 |



## Project: Commercial Center 1

Variant: New simulation variant - Commercial Centre

### PVsyst V7.3.4

VC9, Simulation date:  
24/05/23 07:17  
with v7.3.4

Muzan Ijeoma (United states)

### General parameters

#### Standalone system

#### PV Field Orientation

##### Orientation

Fixed plane  
Tilt/Azimuth 5 / 0 °

#### Standalone system with batteries

##### Sheds configuration

No 3D scene defined

##### Models used

Transposition Perez  
Diffuse Perez, Meteornorm  
Circumsolar separate

#### User's needs

Daily household consumers  
Constant over the year  
Average 561 kWh/Day

### PV Array Characteristics

#### PV module

Manufacturer Generic  
Model JKM585M-7RL4-V  
(Original PVsyst database)  
Unit Nom. Power 585 Wp  
Number of PV modules 312 units  
Nominal (STC) 183 kWp  
Modules 26 Strings x 12 In series

#### At operating cond. (50°C)

Pmpp 167 kWp  
U mpp 483 V  
I mpp 345 A

#### Controller

Universal controller  
Technology MPPT converter  
Temp coeff. -5.0 mV/°C/Elem.

#### Converter

Maxi and EURO efficiencies 97.0 / 95.0 %

#### Total PV power

Nominal (STC) 183 kWp  
Total 312 modules  
Module area 853 m<sup>2</sup>

#### Battery

Manufacturer Generic  
Model EosG 3000  
Technology Lead-acid, sealed, Gel  
Nb. of units 11 in parallel x 30 in series  
Discharging min. SOC 20.0 %  
Stored energy 1587.8 kWh

#### Battery Pack Characteristics

Voltage 60 V  
Nominal Capacity 33000 Ah (C10)  
Temperature Fixed 20 °C

#### Battery Management control

Threshold commands as SOC calculation  
Charging SOC = 0.92 / 0.75  
approx. 68.1 / 62.7 V  
Discharging SOC = 0.20 / 0.45  
approx. 58.9 / 61.1 V

### Array losses

#### Thermal Loss factor

Module temperature according to irradiance  
Uc (const) 29.0 W/m<sup>2</sup>K  
Uv (wind) 0.0 W/m<sup>2</sup>K/m/s

#### DC wiring losses

Global array res. 23 mΩ  
Loss Fraction 1.5 % at STC

#### Series Diode Loss

Voltage drop 0.7 V  
Loss Fraction 0.1 % at STC

#### Module Quality Loss

Loss Fraction -0.8 %

#### Module mismatch losses

Loss Fraction 2.0 % at MPP

#### Strings Mismatch loss

Loss Fraction 0.1 %

#### IAM loss factor

Incidence effect (IAM): Fresnel, AR coating, n(glass)=1.526, n(AR)=1.290

| 0°    | 30°   | 50°   | 60°   | 70°   | 75°   | 80°   | 85°   | 90°   |
|-------|-------|-------|-------|-------|-------|-------|-------|-------|
| 1.000 | 0.999 | 0.987 | 0.962 | 0.892 | 0.816 | 0.681 | 0.440 | 0.000 |

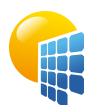

## PVsyst V7.3.4

VC9, Simulation date:  
24/05/23 07:17  
with v7.3.4

Muzan Ijeoma (United states)

## Detailed User's needs

Daily household consumers, Constant over the year, average = 561 kWh/day

## Annual values

|                       | Nb. | Power     | Use      | Energy |
|-----------------------|-----|-----------|----------|--------|
|                       |     | W         | Hour/day | Wh/day |
| Lamps (LED or fluo)   | 155 | 32/lamp   | 12.0     | 59520  |
| ICT                   | 30  | 80/app    | 12.0     | 28800  |
| Coolers Open/Closed   | 20  | 1130/app  | 2.0      | 45200  |
| Fridge / Deep-freeze  | 2   |           | 24       | 151699 |
| Air Conditioning      | 1   | 22500 tot | 12.0     | 270000 |
| Water Heating/Cooking | 1   | 2882 tot  | 2.0      | 5764   |
| Stand-by consumers    |     |           | 24.0     | 24     |
| Total daily energy    |     |           |          | 561007 |

## Hourly distribution

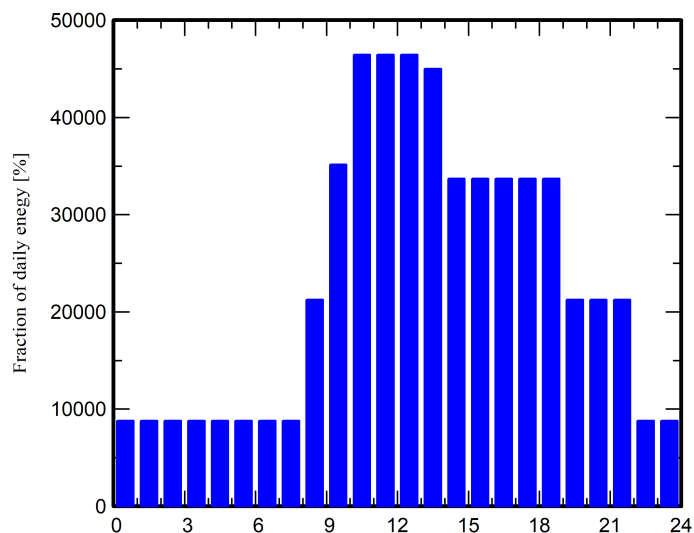



## Project: Commercial Center 1

Variant: New simulation variant - Commercial Centre

### PVsyst V7.3.4

VC9, Simulation date:  
24/05/23 07:17  
with v7.3.4

Muzan Ijeoma (United states)

### Main results

#### System Production

Useful energy from solar 196780 kWh/year  
Available solar energy 241630 kWh/year  
Excess (unused) 37436 kWh/year

Perf. Ratio PR 69.58 %  
Solar Fraction SF 96.10 %

#### Loss of Load

Time Fraction 3.9 %  
Missing Energy 7987 kWh/year

#### Battery aging (State of Wear)

Cycles SOW 97.0 %  
Static SOW 93.3 %

Normalized productions (per installed kWp)

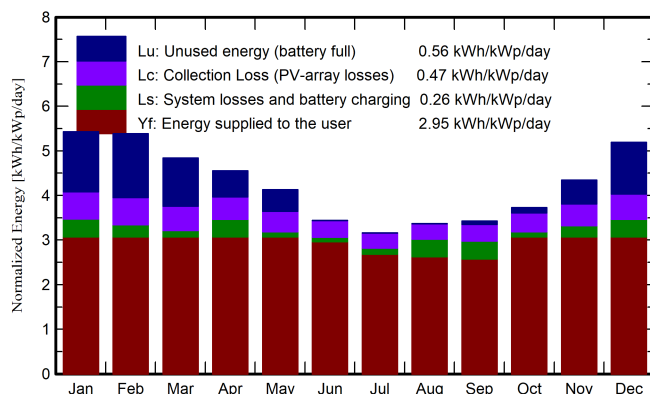

Performance Ratio PR

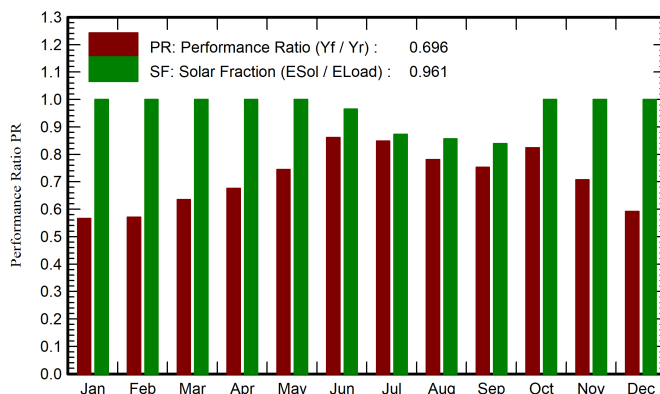

### Balances and main results

|           | GlobHor            | GlobEff            | E_Avail | EUnused | E_Miss | E_User | E_Load | SolFrac |
|-----------|--------------------|--------------------|---------|---------|--------|--------|--------|---------|
|           | kWh/m <sup>2</sup> | kWh/m <sup>2</sup> | kWh     | kWh     | kWh    | kWh    | kWh    | ratio   |
| January   | 161.2              | 165.0              | 26508   | 7627    | 0      | 17391  | 17391  | 1.000   |
| February  | 146.7              | 148.2              | 23675   | 7301    | 0      | 15708  | 15708  | 1.000   |
| March     | 148.8              | 147.1              | 23483   | 6077    | 0      | 17391  | 17391  | 1.000   |
| April     | 138.0              | 133.6              | 21311   | 3163    | 0      | 16830  | 16830  | 1.000   |
| May       | 131.1              | 124.8              | 19966   | 2712    | 0      | 17391  | 17391  | 1.000   |
| June      | 106.2              | 100.4              | 15943   | 2       | 590    | 16240  | 16830  | 0.965   |
| July      | 100.4              | 95.3               | 15094   | 2       | 2201   | 15191  | 17391  | 0.873   |
| August    | 106.0              | 101.7              | 16248   | 1       | 2489   | 14903  | 17391  | 0.857   |
| September | 102.9              | 100.1              | 15879   | 410     | 2708   | 14123  | 16830  | 0.839   |
| October   | 114.1              | 112.5              | 17781   | 654     | 0      | 17391  | 17391  | 1.000   |
| November  | 126.3              | 127.1              | 20291   | 2916    | 0      | 16830  | 16830  | 1.000   |
| December  | 153.5              | 157.6              | 25451   | 6571    | 0      | 17391  | 17391  | 1.000   |
| Year      | 1535.2             | 1513.6             | 241630  | 37436   | 7987   | 196780 | 204768 | 0.961   |

#### Legends

GlobHor Global horizontal irradiation  
GlobEff Effective Global, corr. for IAM and shadings  
E\_Avail Available Solar Energy  
EUnused Unused energy (battery full)  
E\_Miss Missing energy

E\_User Energy supplied to the user  
E\_Load Energy need of the user (Load)  
SolFrac Solar fraction (EUsed / ELoad)

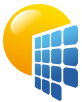

## Project: Commercial Center 1

Variant: New simulation variant - Commercial Centre

### PVsyst V7.3.4

VC9, Simulation date:  
24/05/23 07:17  
with v7.3.4

Muzan Ijeoma (United states)

### Loss diagram

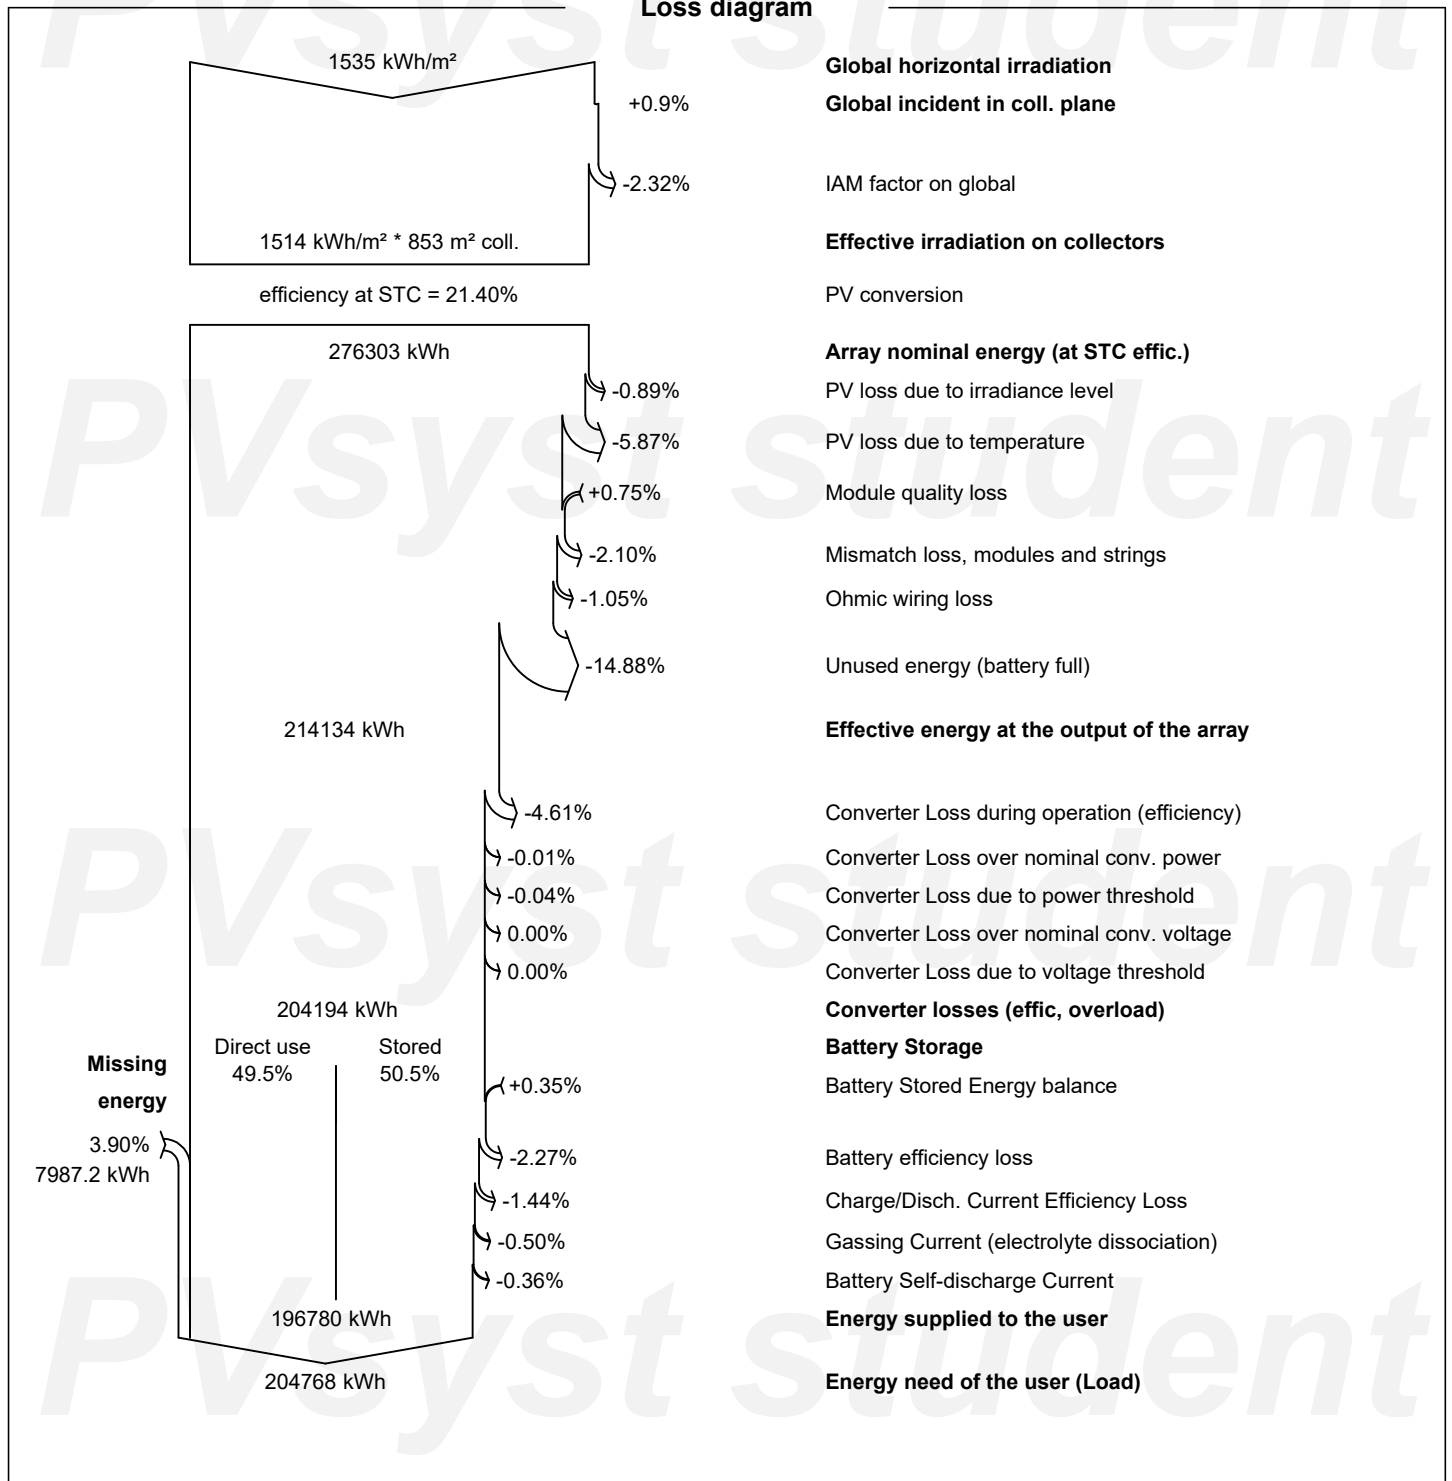

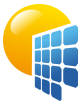

Predef. graphs

Daily Input/Output diagram

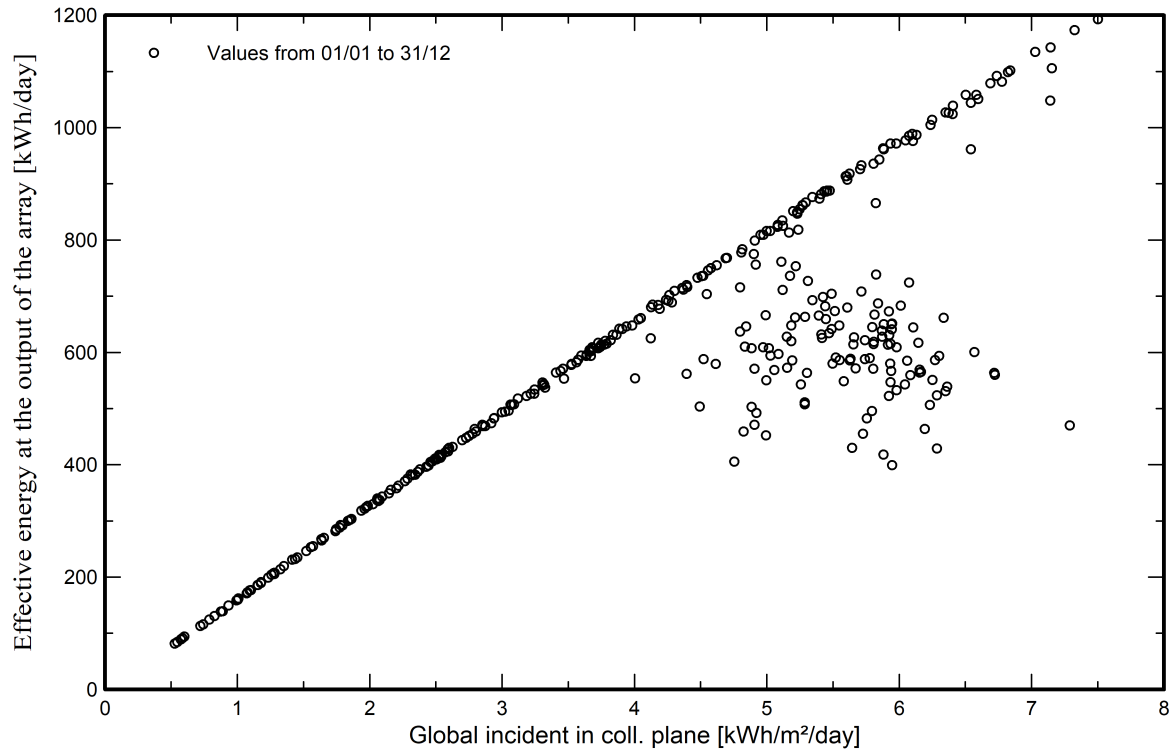



# Project: Commercial Center 1

Variant: New simulation variant - Commercial Centre

## PVsyst V7.3.4

VC9, Simulation date:  
24/05/23 07:17  
with v7.3.4

Muzan Ijeoma (United states)

### Cost of the system

#### Installation costs

| Item | Quantity<br>units | Cost<br>USD       | Total<br>USD |
|------|-------------------|-------------------|--------------|
|      |                   | Total             | 0.00         |
|      |                   | Depreciable asset | 0.00         |

#### Operating costs

| Item         | Total    |
|--------------|----------|
|              | USD/year |
| Total (OPEX) | 0.00     |

#### System summary

|                              |               |
|------------------------------|---------------|
| Total installation cost      | 0.00 USD      |
| Operating costs              | 0.00 USD/year |
| Excess energy (battery full) | 37.4 MWh/year |
| Used solar energy            | 197 MWh/year  |
| Used energy cost             | 0.377 USD/kWh |
